# Supplementary material
Source: PubMed Central journal article supplement (PMC1478202)
Supplement: 7601141s2.pdf [file 7601141s2.pdf]

# Supplementary Table I

*S. pombe* strains used in this study.

| Strain | Genotype                                                                 | Origin            |
|--------|--------------------------------------------------------------------------|-------------------|
| PR109  | wt h-                                                                    | Lab collection    |
| SC3250 | <i>rqh1::ura4</i> h-                                                     | Lab collection    |
| PS3    | <i>ade 6-M375 int::pUC8/ura4+/ade 6-L469</i> h-                          | Osman et al, 1996 |
| VM3720 | <i>sws1::kanR srs2::LEU2 rqh1::ura4</i> h-                               | This study        |
| VM3721 | <i>sws1::kanMX srs2::LEU2</i> h-                                         | This study        |
| VM3722 | <i>sws1::KanMX rqh1::ura4</i> h-                                         | This study        |
| VM3723 | <i>sws1::kanMX</i> h-                                                    | This study        |
| VM3724 | <i>srs2::LEU2</i> h+                                                     | This study        |
| VM3725 | <i>rad22-YFP:kanMX</i> h-                                                | This study        |
| VM3726 | <i>rqh1::ura4 rad22-YFP:kanMX</i> h-                                     | This study        |
| VM3727 | <i>srs2::LEU2 rad22-YFP:kanMX ade6-M210</i> h+                           | This study        |
| VM3728 | <i>srs2::LEU2 sws1::kanMX rad22-YFP:kanMX</i> h+                         | This study        |
| VM3729 | <i>sws1::kanMX rad22-YFP:kanMX</i> h-                                    | This study        |
| VM3730 | <i>rqh1::ura4 sws1::kanMX rad22-YFP:kanMX</i> h-                         | This study        |
| VM3731 | <i>sws1::kanMX ade 6-M375 int::pUC8/ura4+/ade 6-L469</i> h-              | This study        |
| VM3732 | <i>rqh1::kanMX ade 6-M375 int::pUC8/ura4+/ade 6-L469</i> h-              | This study        |
| VM3733 | <i>rqh1::kanMX sws1-1(C152S) cdc2-GFP:kanMX</i> h-                       | This study        |
| VM3734 | <i>sws1-1(C152S) cdc2-GFP:kanMX</i> h-                                   | This study        |
| VM3735 | <i>rqh1::ura4 srs2::kanMX sws1::kanMX</i> h+                             | This study        |
| VM3736 | <i>sws1::kanMX rqh1::kanMX ade 6-M375 int::pUC8/ura4+/ade 6-L469</i> h+  | This study        |
| VM3737 | <i>rqh1::kanMX sws1::kanMX</i> h-                                        | This study        |
| VM3738 | <i>rlp1::kanR rad22-YFP::kanMX</i> h-                                    | This study        |
| VM3739 | <i>rhp55::ura4 rad22-YFP::kanMX his3-D1</i> h-                           | This study        |
| VM3740 | <i>rlp1::kanMX rqh1::ura4</i> h+                                         | This study        |
| VM3741 | <i>rlp1::kanMX</i> h+                                                    | This study        |
| VM3742 | <i>rlp1::kanR sws1::kanMX rqh1::ura4</i> h-                              | This study        |
| VM3743 | <i>rlp1::kanMX rqh1::ura4 rad22-YFP:kanMX</i> h-                         | This study        |
| VM3744 | <i>rdl1::kanMX</i> h+                                                    | This study        |
| VM3745 | <i>rqh1::ura4 rdl1::kanMX</i> h+                                         | This study        |
| VM3746 | <i>rdl1::kanMX sws1::kanMX rqh1::ura4</i> h+                             | This study        |
| VM3747 | <i>rdl1::kanMX rad22-YFP::kanMX</i> h+                                   | This study        |
| VM3748 | <i>rhp57::kanMX ade 6-M375 int::pUC8/ ura4+/ade 6-L469</i> h-            | This study        |
| VM3749 | <i>rlp1::kanMX ade 6-M375 int::pUC8/ ura4+/ade 6-L469</i> h-             | This study        |
| VM3750 | <i>rdl1::kanMX rqh1::kanMX ade 6-M375 int::pUC8/ ura4+/ade 6-L469</i> h+ | This study        |
| VM3751 | <i>rdl1::kanMX ade 6-M375 int::pUC8/ ura4+/ade 6-L469</i> h-             | This study        |
| VM3752 | <i>rhp57::ura4 rad22-YFP:kanMX</i> h+                                    | This study        |
| VM3753 | <i>rlp1::kanMX rqh1::kanMX ade6-M375 int::pUC8/ ura4+/ade6-L469</i> h-   | This study        |
| VM3754 | <i>rdl1::kanMX rqh1::kanMX rad22-YFP::kanMX</i> h+                       | This study        |
| VM3755 | <i>rdl1::kanMX rlp1::kanMX sws1::hphMX</i> h-                            | This study        |
| VM3756 | <i>srs2::LEU2 rqh1::ura4</i> h-                                          | This study        |
| VM3757 | <i>sws1::kanR srs2::kanMX</i> h-                                         | This study        |
