# Supplementary material
Source: PubMed Central journal article supplement (PMC1478202)
Supplement: 7601141s3.pdf [file 7601141s3.pdf]

## Supplementary Table II

Sws1 TAP purification mass spec analysis

| PROTEIN                       | % COVERAGE | TOTAL NUMBER OF PEPTIDES | UNIQUE PEPTIDES                                                                                                                                                                                                                                                                            |
|-------------------------------|------------|--------------------------|--------------------------------------------------------------------------------------------------------------------------------------------------------------------------------------------------------------------------------------------------------------------------------------------|
| <b>Sws1</b><br>(SPBC11B10.06) | 49.3%      | 26                       | KTLNSSSLPVSSKF (x2)<br>KFSHTNDPDVEGVDNDSFSKA (x3)<br>DPDVEGVDNDSFSKA (x3)<br>VEGVDNDSFSKALCNKDL (x2)<br>VDNDSFSKALCNKDLPSSTIRS (x3)<br>KALCNKDLPSSTIRS (x3)<br>KDLPSSTIRS (x1)<br>RSVISSLLDSLQDKA (x2)<br>KALQQSPNTSLSKL (x2)<br>PNTSLSKLLLEDQDFGSLWLSLSFIFC (x3)<br>DSKSIHPLPLTDGEVL (x2) |
| <b>Rlp1</b>                   | 23.4%      | 11                       | KLENESTVHLQNAARE (x2)<br>EDINSNSVNDVSLSSGETMLQFPEH (x2)<br>LQFPEHEEQHEC (x2)<br>RKIDAQCAILWPMFESGGVVESIPQSTKD (x3)<br>KLFGCPVVCTNWLLNNKQ (x2)                                                                                                                                              |
| <b>Rdl1</b><br>(SPAC17H9.03c) | 9.6%       | 1                        | RIMWIDTLGTFNPAALPLCLEKT (x1)                                                                                                                                                                                                                                                               |
