# Supplementary material
Source: PubMed Central journal article supplement (PMC1478202)
Supplement: 7601141s4.pdf [file 7601141s4.pdf]

# Supplementary Figure 1

**A**

**Sws1-GFP**

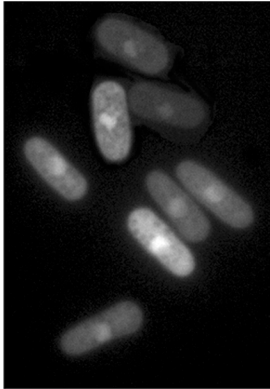

**B**

**- Triton**

**+ Triton**

**Sws1-GFP**

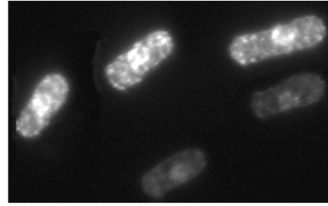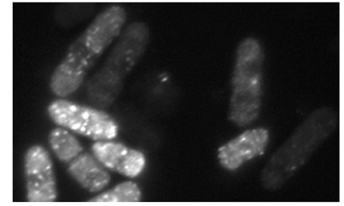

**DAPI**

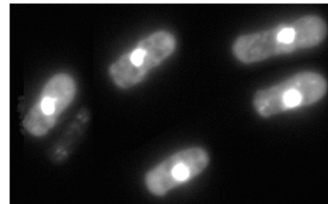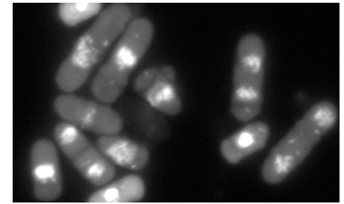

**C**

**Sws1-C152S-GFP**

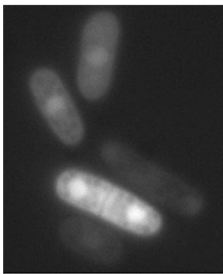

**D**

**Rlp1-GFP**

**Rdl1-GFP**

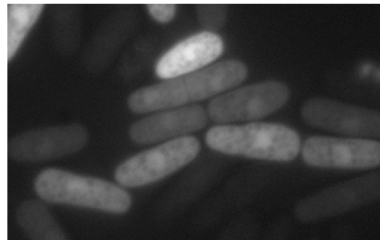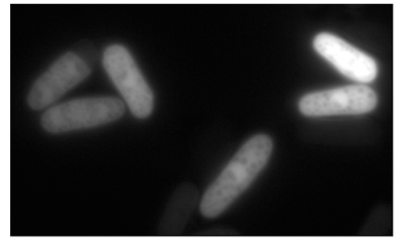

**Supplementary Figure 1. Localization of Sws1, Sws1-C152S, Rlp1 and Rdl1.**

**A.** Localization of Sws1-GFP fusion protein expressed from a pREP41x vector in *sws1Δ* (VM3723) mutant live cells. Cells were grown at 32°C in EMM-B1 for 21 hours. The signal intensity varies between cells because of plasmid copy number variation.

**B.** *in situ* chromatin binding assay. After 21 hours of growth in the absence of vitamin B1 (thiamine), spheroplasts were obtained from *sws1Δ* (VM3723) cells transformed with a pREP41x plasmid expressing Sws1-GFP. GFP signal and DAPI staining of spheroplasts before and after X-100 Triton extraction is shown.

**C.** Localization of Sws1-C152S-GFP fusion protein expressed from a pREP41x vector in *sws1Δ* (VM3723) mutant cells. Picture was taken after a 21 hour- incubation at 32°C in the absence of thiamine.

**D.** Localization of Rlp1-GFP and Rdl1-GFP fusion proteins expressed from pREP41x vectors in *rlp1Δ* (VM3741) and *rdl1Δ* (VM3744) mutant cells respectively. Cells were grown at 32°C in EMM-B1 for 21 hours.
