# Supplementary material
Source: PubMed Central journal article supplement (PMC1478202)
Supplement: 7601141s5.pdf [file 7601141s5.pdf]

# Supplementary Figure 2

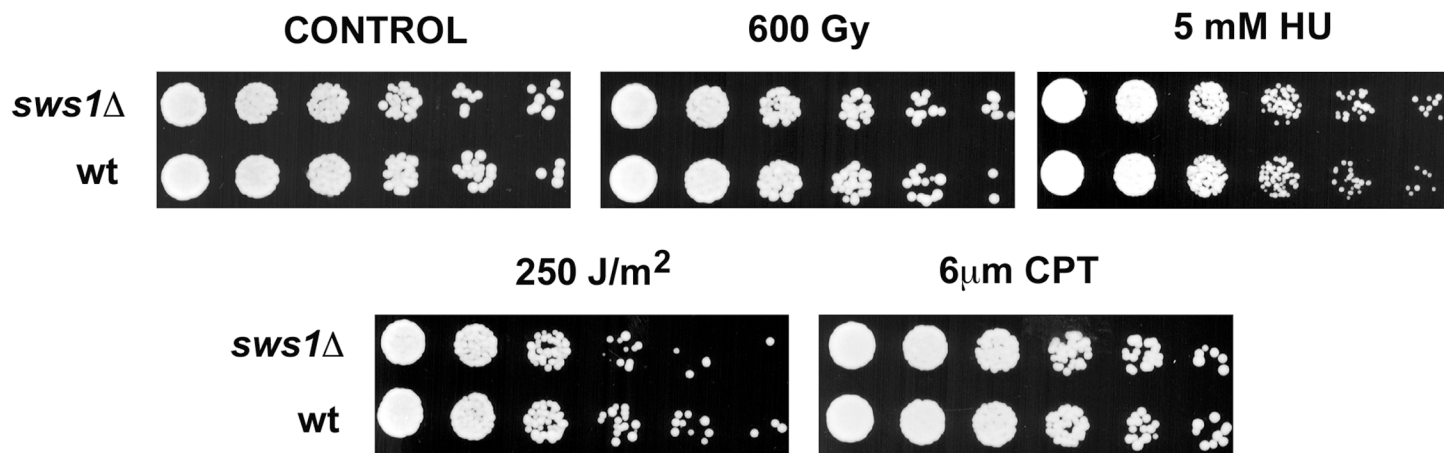

**Supplementary Figure 2. DNA damage survival assay.**

Fourfold serial dilutions of wt (PR109) and *sws1*Δ (VM3723) cells were plated on YES media and exposed to the indicated sources of DNA damage. Photographs were taken after 4 days at 32°C.
