# Supplementary material
Source: PubMed Central journal article supplement (PMC1478202)
Supplement: 7601141s6.pdf [file 7601141s6.pdf]

## Supplementary Figure 3

```
ttttattttaaagggtattctcaatatatacaaatccacaccagtggttatatactgtactcgaatggtgacgaccttctgcttctttaatccat
accetaattaataataatccatgtagatagttcaacaaaaaacatgagataagattcaacacacactcatgattagttaaataactgtgagccattccgga
aatTTTgacgattgtacgtatcttttcttcaacgcatttgggtgtttatctcttttagaatgccattagcataaccaggggatgatt
gcaaaaatcaatttcattgatcatcaatatcgttggaaaaaacaattctatcgaagtttaagcataccaagcaaatcttaagc
agcttatatatttctgacattatgaatcaggttactcaatttagtggaattctgcaaaccttgatgcttactggattctaaaaagtattactc
      ───────────────────────────────────────────────────────────────────────────────────────────────────▶ M L Y W I L K S Y Y S

taggtttagatagaattatggtgattgatactttaggtactttcaatccggctgcactccctcttccatgtcttgaaaaaactatggtggttagatcattcg
▶ R F D R I M W I D T L G T F N P A A L P L P C L E K T M L V R S F

atgctcagggatgaaggatgcagttgatgagttggaagcaatctcaaaagctccgaagatcaagcatatgcattgtgtatagattccttttctaatccc
▶ D A Q G L K D A V D E L E S N L K S S E D Q A Y A L C I D S F S N P

attggttggtaaatggctcagggcaatataatctttgcacatgcattcatgatgactttaggaagaaaatgccgaatccttaccagaaaattcagattagc
▶ I G L L M A Q G N I S F A H A F M M T L G R K C R I L T R K F R L A

agtatactatctacttctcttgtgtacataaagcaactccacttttcaaacccagcgtgggaacagctggccattttgttcttgaccattcatatattc
▶ V Y L S T S L V Y I K Q L H L S K P A L G N S W P F C L D H S Y I

tagaagatcaacagcataataaatggttagtacattgcaaccaaagtcgtaagatttactaggttgcacaaacttttttactccttaaaaggttcgttt
▶ L E D Q Q H N K C L V H C N Q S R K D L L G C S Q L F L L L K G S F

actcaagaatatttgactattgatttctacaatggtaacctgtctctgtttcatctaaattgcatgtatcaccagctctgtatcactcatctacgtcaa
▶ T H E Y L T I D F Y N G T P V S V S S K L H V S P S L Y H S S T L N

cagtcacatgatgatactacccccaaaatatcaaagtttaaaaaatatgtagatgacttattaa
▶ S P S *
```

**Supplementary Figure 3. *S. pombe* Rdl1 sequence used in this work.**

5' RACE analysis revealed the presence of an intron (in red) that contains the annotated start codon of the *rdl1*<sup>+</sup> genes (represented with an arrow). A stop codon is found a few residues upstream of the beginning of the intron (framed tga). No coding sequence keeping the same frame of the gene could be found in the 5' untranslated region (5'-UTR) of *rdl1*<sup>+</sup>. In blue, we show the sequence of Rdl1 used during this study.

Invitrogen 5'RACE System for Rapid Amplification of cDNA Ends was used for the amplification of the 5'-end of *S. pombe* Rdl1 mRNA following manufacture's instructions.
