# Supplementary material
Source: PubMed Central journal article supplement (PMC1478202)
Supplement: 7601141s7.pdf [file 7601141s7.pdf]

# Supplementary Figure 4

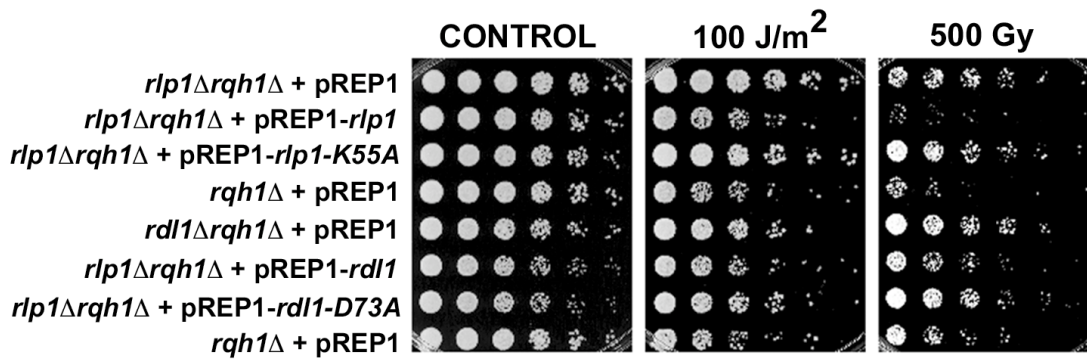

**Supplementary Figure 4. The Walker A and Walker B domains of Rlp1 and Rdl1, respectively, are required for the pro-recombinogenic function of the complex.**

Mutations in the Walker A motif of Rlp1 (K55A) and Walker B motif of Rdl1 (D73A) were created and the correspondent mutants expressed under the control of the *nmt1* promoter (plasmid pREP1). An *rlp1Δrqh1Δ* strain was transformed either with the empty vector (+ pREP1), a vector expressing wt *rlp1*<sup>+</sup> (+ pREP-*rlp1*) or a vector containing the mutated version of the gene (+ pREP1-*rlp1-K55A*). Expression of *rlp1-K55A* (Walker A mutation) did not affect the DNA damage sensitivity of the transformed strain, while expression of *rlp1*<sup>+</sup> compromised survival after DNA damage. Similar results are shown in the case of *rdl1*<sup>+</sup>. Fourfold serial dilutions of each strain were plated on EMM plates containing thiamine (expression from the pREP1 vector was sufficient to induce gene expression in these conditions). The control plate and plates treated with 100 J/m<sup>2</sup> or 500 Gy are shown. Photographs were taken after 5 days of incubation at 32°C. The strains used in this assay were *rqh1Δ* (SC3250), *rlp1Δrqh1Δ* (VM3740), and *rdl1Δrqh1Δ* (VM3745).
